# Supplementary material
Source: PubMed Central journal article supplement (PMC5923110)
Supplement: AAC.02434-17_zac005187124s1.pdf [file AAC.02434-17_zac005187124s1.pdf]

**Table S1.** Antimicrobial susceptibility of IMP-4-producing wildtype and recombinant strains.

| Isolate                               | MIC ( $\mu\text{g/ml}$ ) of: <sup>a</sup> |          |     |     |     |             |             |      |             |             |     |     |             |             |             |      |
|---------------------------------------|-------------------------------------------|----------|-----|-----|-----|-------------|-------------|------|-------------|-------------|-----|-----|-------------|-------------|-------------|------|
|                                       | PIP                                       | TZP      | CTZ | CAZ | FEP | ATM         | MER         | ETP  | GEN         | AMK         | CHL | TET | SXT         | CIP         | CST         | TGC  |
| <i>E. aerogenes</i> Ea1631            | 64                                        | 8        | >8  | 16  | 8   | $\leq 0.12$ | 0.5         | 1    | 16          | 1           | >32 | >32 | >4          | 1           | 0.5         | 0.25 |
| <i>E. coli</i> MT102 (pEa1631)        | 32                                        | 2        | >8  | 8   | 4   | $\leq 0.12$ | $\leq 0.12$ | 0.25 | 32          | $\leq 0.25$ | 2   | 1   | $\leq 0.03$ | $\leq 0.06$ | $\leq 0.12$ | 0.12 |
| <i>E. coli</i> Ec42                   | 2                                         | 2        | 8   | 16  | 2   | $\leq 0.12$ | $\leq 0.12$ | 0.12 | 0.5         | 1           | 4   | 1   | 0.06        | 0.12        | 0.25        | 0.25 |
| <i>E. coli</i> MT102 (pEc42)          | $\leq 1$                                  | $\leq 1$ | 8   | 8   | 2   | $\leq 0.12$ | $\leq 0.12$ | 0.03 | $\leq 0.25$ | $\leq 0.25$ | 2   | 0.5 | $\leq 0.03$ | $\leq 0.06$ | 0.25        | 0.12 |
| <i>E. coli</i> Ec1675                 | 32                                        | 2        | >8  | 8   | 4   | 16          | 0.25        | 0.25 | 0.5         | 1           | >32 | 1   | >4          | 0.5         | 0.25        | 0.12 |
| <i>E. coli</i> DH5 $\alpha$ (pEc1675) | 64                                        | 2        | 8   | 8   | 4   | 16          | $\leq 0.12$ | 0.12 | 8           | 1           | 2   | 1   | >4          | $\leq 0.06$ | 0.25        | 0.25 |
| <i>P. penneri</i> Pp47                | 16                                        | $\leq 1$ | 8   | >16 | 16  | 0.25        | 0.25        | 0.06 | >32         | 2           | >32 | >32 | >4          | 8           | >16         | 2    |
| <i>E. coli</i> MT102 (pPp47)          | 2                                         | 4        | >8  | 8   | 16  | $\leq 0.12$ | 0.25        | 0.25 | 16          | $\leq 0.25$ | 2   | 32  | $\leq 0.03$ | $\leq 0.06$ | $\leq 0.12$ | 0.25 |
| <i>P. mirabilis</i> Pm60              | 16                                        | $\leq 1$ | 8   | 16  | 16  | 0.25        | 0.5         | 0.12 | >32         | 1           | >32 | >32 | >4          | 4           | >16         | 2    |
| <i>E. coli</i> MT102 (pPm60)          | 4                                         | 4        | >8  | 8   | 16  | $\leq 0.12$ | 0.5         | 1    | >32         | $\leq 0.25$ | 2   | >32 | >4          | $\leq 0.06$ | $\leq 0.12$ | 0.25 |
| <i>E. coli</i> Ec1677                 | 16                                        | 2        | >8  | >16 | >16 | 0.25        | 2           | 1    | 8           | 1           | 8   | 32  | >4          | 4           | >16         | 1    |
| <i>E. coli</i> MT102 (pEc1677)        | 2                                         | 4        | 8   | 8   | 16  | $\leq 0.12$ | $\leq 0.12$ | 0.12 | 0.5         | $\leq 0.25$ | 2   | 1   | $\leq 0.03$ | $\leq 0.06$ | 0.25        | 0.25 |

<sup>a</sup>PIP, piperacillin; TZP, piperacillin-tazobactam (inhibitor fixed at 4  $\mu\text{g/ml}$ ); CTX, cefotaxime; CAZ, ceftazidime; FEP, cefepime; ATM, aztreonam; MEM, meropenem; ETP, ertapenem; GEN, gentamicin; AMK, amikacin; CHL, chloramphenicol; TET, tetracycline; SXT, trimethoprim-sulfamethoxazole; CIP, ciprofloxacin; CST, colistin; TGC, tigecycline.





**Figure S1.** Overview of the plasmids pEa1631, pEc42, pEc1675, pPp47, pPm60 and pEc1677. The innermost circles show the main regions of the plasmids. Similarities with other plasmids are shown in the next circle; each color represents a unique plasmid. In the outer circle, indicative genes and the direction of transcription are shown by arrows. Replicons of the plasmid are indicated as pink arrows. Genes responsible for plasmid transfer and maintenance are shown in green and orange, respectively.
